# Supplementary material for: High-field emission performance of a NiFe2O4/rGO/CNT tertiary nanocomposite
Source: Royal Society of Chemistry journal article supplement (doi:10.1039/c6ra02198k), 2016-01-01
Supplement: c6ra02198k1.pdf [file c6ra02198k1.pdf]

## **Electronic Supplementary Information (ESI)**

# **High field emission performance of NiFe<sub>2</sub>O<sub>4</sub>/rGO/CNTs tertiary nanocomposite**

K. Hareesh,<sup>a</sup> Sachin R. Suryawanshi,<sup>a</sup> B. Shateesh,<sup>b</sup> Deodatta M. Phase,<sup>c</sup> Shailendra S. Dahiwale,<sup>a</sup> Vasanth N. Bhoraskar,<sup>a</sup> Santhosh K. Haram,<sup>b</sup> Mahendra A. More,<sup>a,\*</sup> Sanjay D. Dhole,<sup>a,\*</sup>

<sup>a</sup>*Department of Physics, Savitribai Phule Pune University, Pune-411007, India*

<sup>b</sup>*Department of Chemistry, Savitribai Phule Pune University, Pune-411007, India*

<sup>c</sup>*UGC-DAE consortium, Indore-452017, India*

\* Corresponding authors e-mail: sanjay@physics.unipune.ac.in (SDD); mam@physics.unipune.ac.in (MAM)

**Figure S1:**

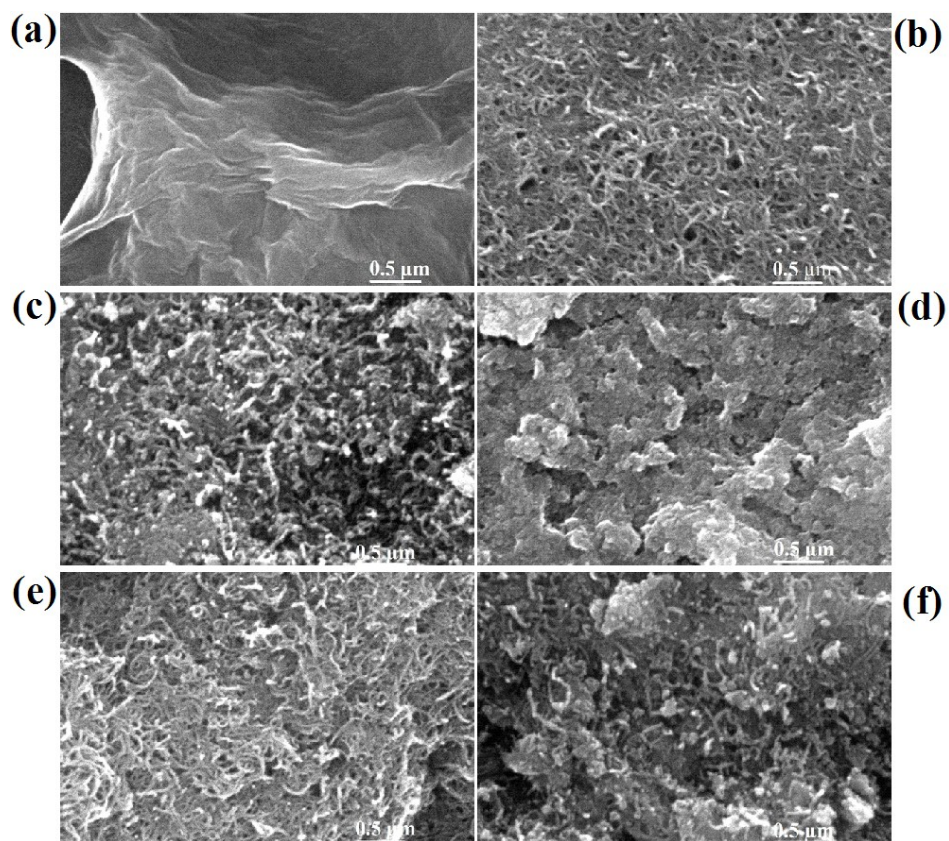

**Fig. S1.** SEM images of (a) GO, (b) CNTs, (c) NC, (d) NG, (e) GC and (f) NGC nanocomposites.

Figure S2:

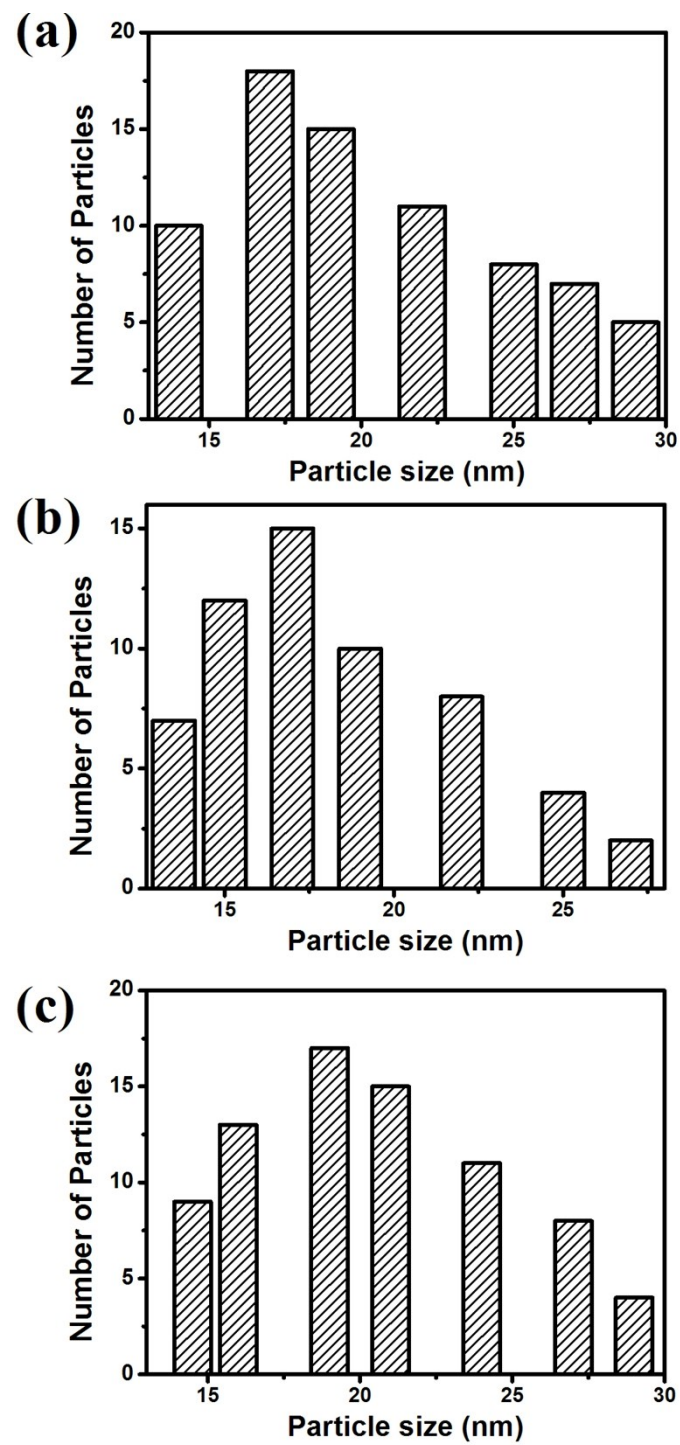

Fig. S2. Particle size distribution plots for NiFe<sub>2</sub>O<sub>4</sub> in (a) NGC, (b) NC and (c) NG nanocomposites.

Figure S3:

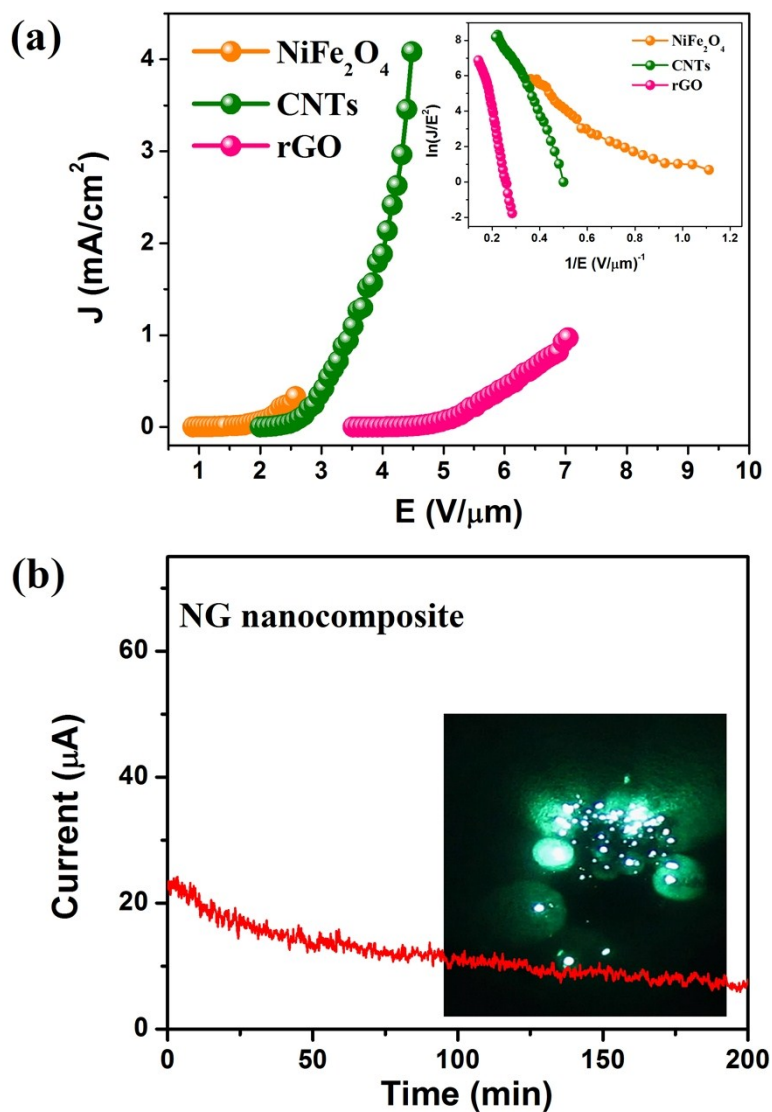

**Fig. S3.** (a) Field emission current density ( $J$ ) versus applied electric field ( $E$ ) plots of pristine NiFe<sub>2</sub>O<sub>4</sub>, rGO and CNTs emitters. Inset shows the corresponding F-N plots. (b) Emission current versus time plot of NG nanocomposite emitter. Inset shows the FE image recorded at the onset of stability study.

**Figure S4:**

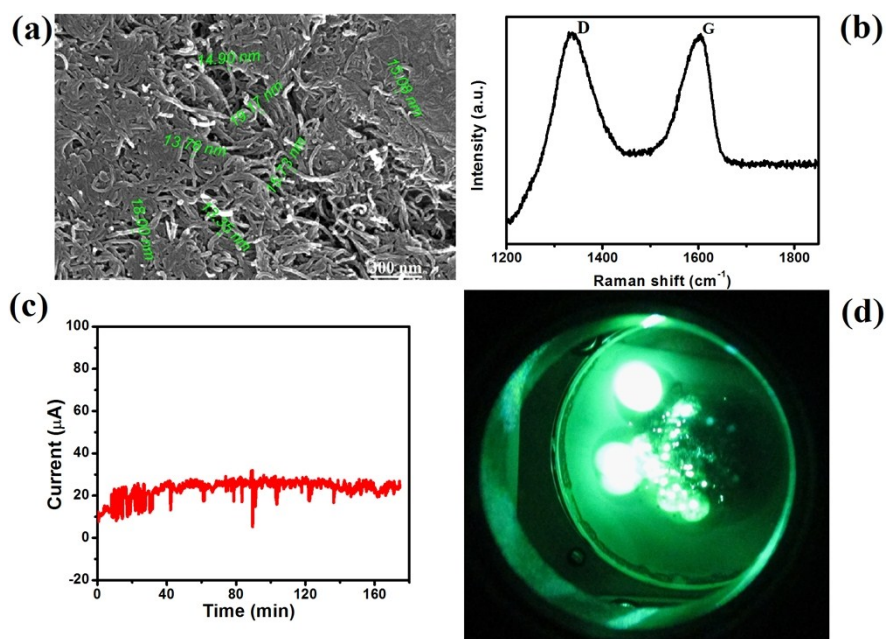

**Fig. S4.** (a) FESEM image, (b) Raman spectrum, (c) Emission current versus time plot and (d) FE image recorded at the onset of stability study for GC nanocomposite.

**Figure S5:**

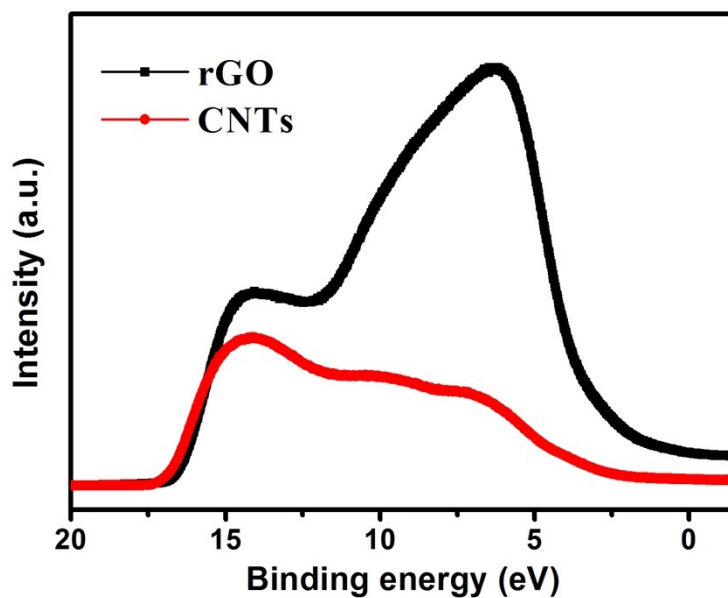

**Fig. S5.** Ultraviolet photoelectron spectra of pristine rGO and CNTs.

**Figure S6:**

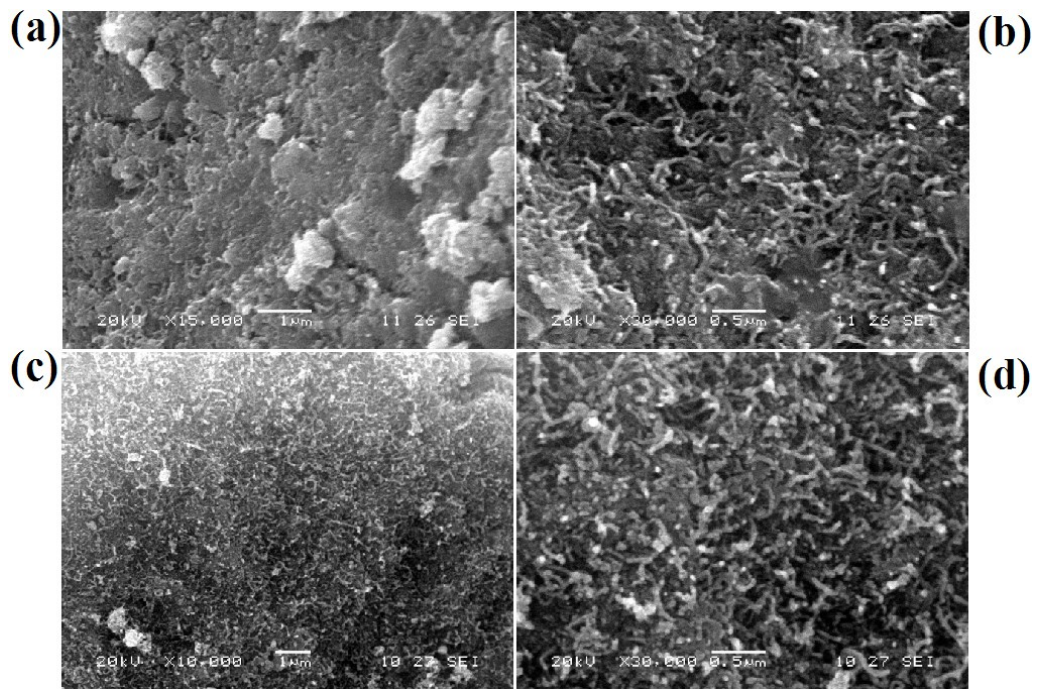

**Fig. S6.** Post field emission SEM images of (a, b) NGC and (c, d) NC nanocomposite emitters.
